# Supplementary material
Source: PubMed Central journal article supplement (PMC31871)

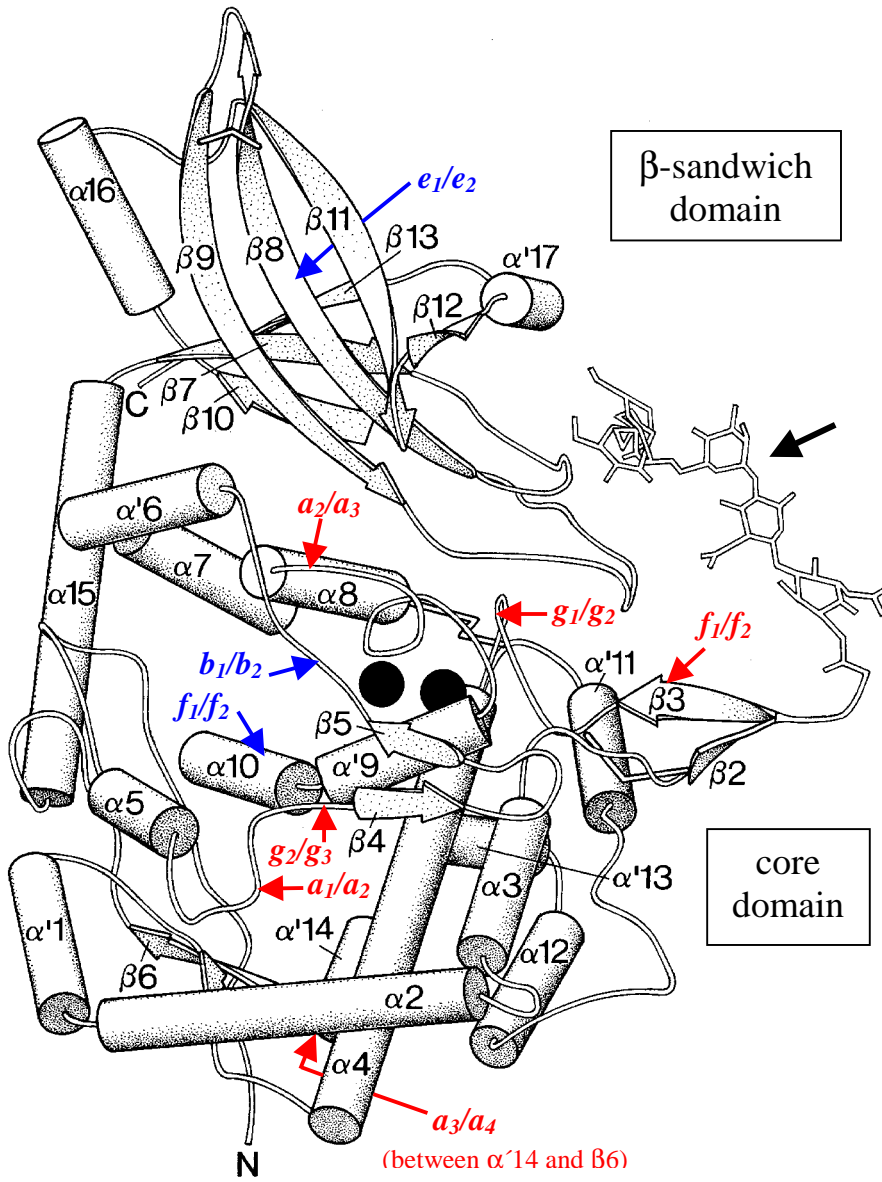

Supplement: pnas_071049998_5.pdf [file pnas_071049998_5.pdf]

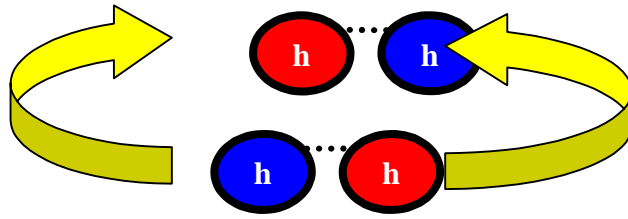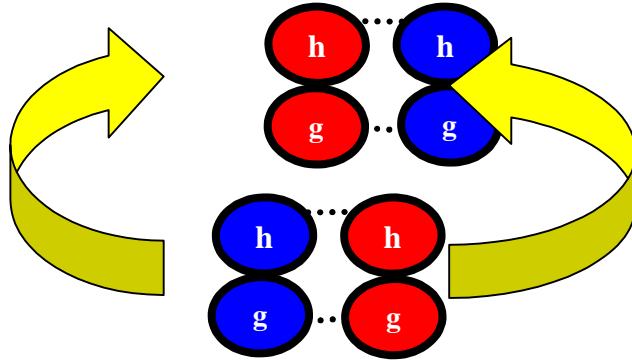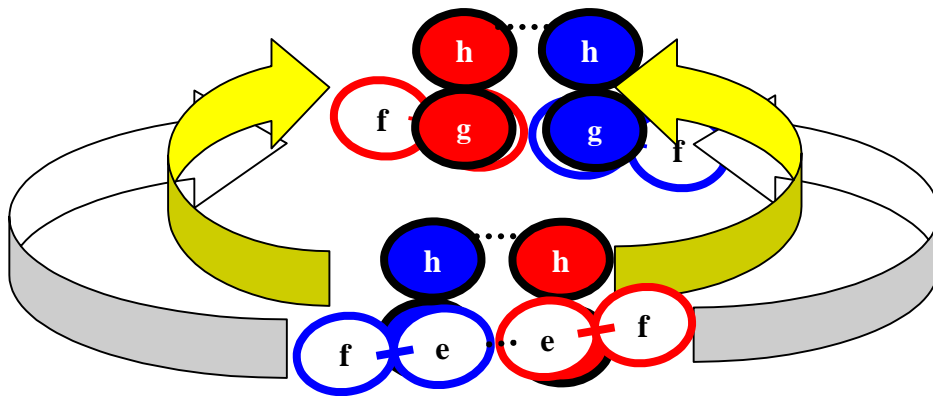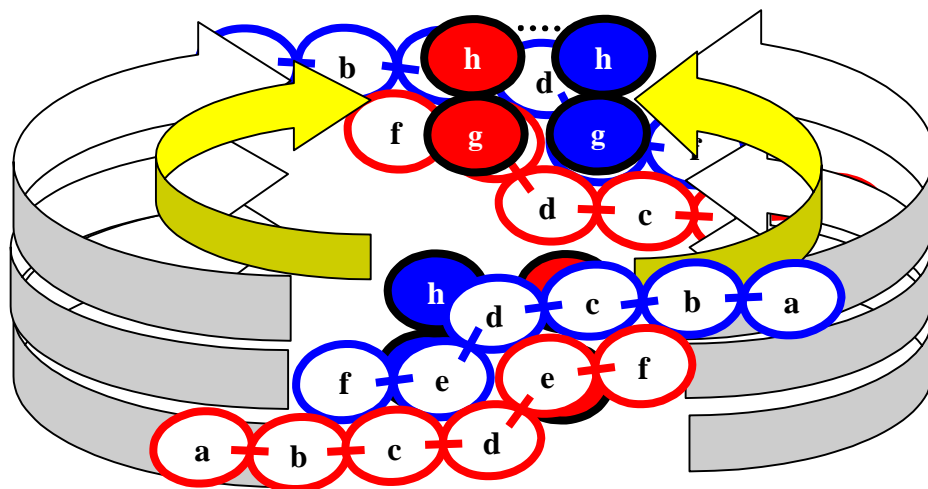

Supplement: pnas_071049998_7.pdf [file pnas_071049998_7.pdf]
